# Supplementary material
Source: PubMed Central journal article supplement (PMC6066334)
Supplement: EHP1829.s001.acco.pdf [file EHP1829.s001.acco.pdf]

**Note to readers with disabilities:** *EHP* strives to ensure that all journal content is accessible to all readers. However, some figures and Supplemental Material published in *EHP* articles may not conform to [508 standards](#) due to the complexity of the information being presented. If you need assistance accessing journal content, please contact [ehp508@niehs.nih.gov](mailto:ehp508@niehs.nih.gov). Our staff will work with you to assess and meet your accessibility needs within 3 working days.

### **Supplemental Material**

#### **Prenatal Exposure to Phthalates and the Development of Eczema Phenotypes in Male Children: Results from the EDEN Mother–Child Cohort Study**

Munawar Hussain Soomro, Nour Baiz, Claire Philippat, Celine Vernet, Valerie Siroux, Cara Nichole Maesano, Shreosi Sanyal, Remy Slama, Carl-Gustaf Bornehag, and Isabella Annesi-Maesano

#### **Table of Contents**

**Figure S1.** Directed acyclic graph (DAG) for evaluation of covariate selection in the analysis of phthalates and eczema. Green nodes: Variables associated to phthalates levels, Blue nodes: Variables associated to eczema occurrence, Red nodes: Variables associated to phthalates and eczema outcomes.

**Table S1.** Spearman correlation between ln-transformed standardized urinary concentrations of phthalate metabolites.

**Table S2.** Association between maternal urinary concentrations of phthalate metabolites and occurrence of ever eczema in boys according to atopic status as assessed by Total IgE.

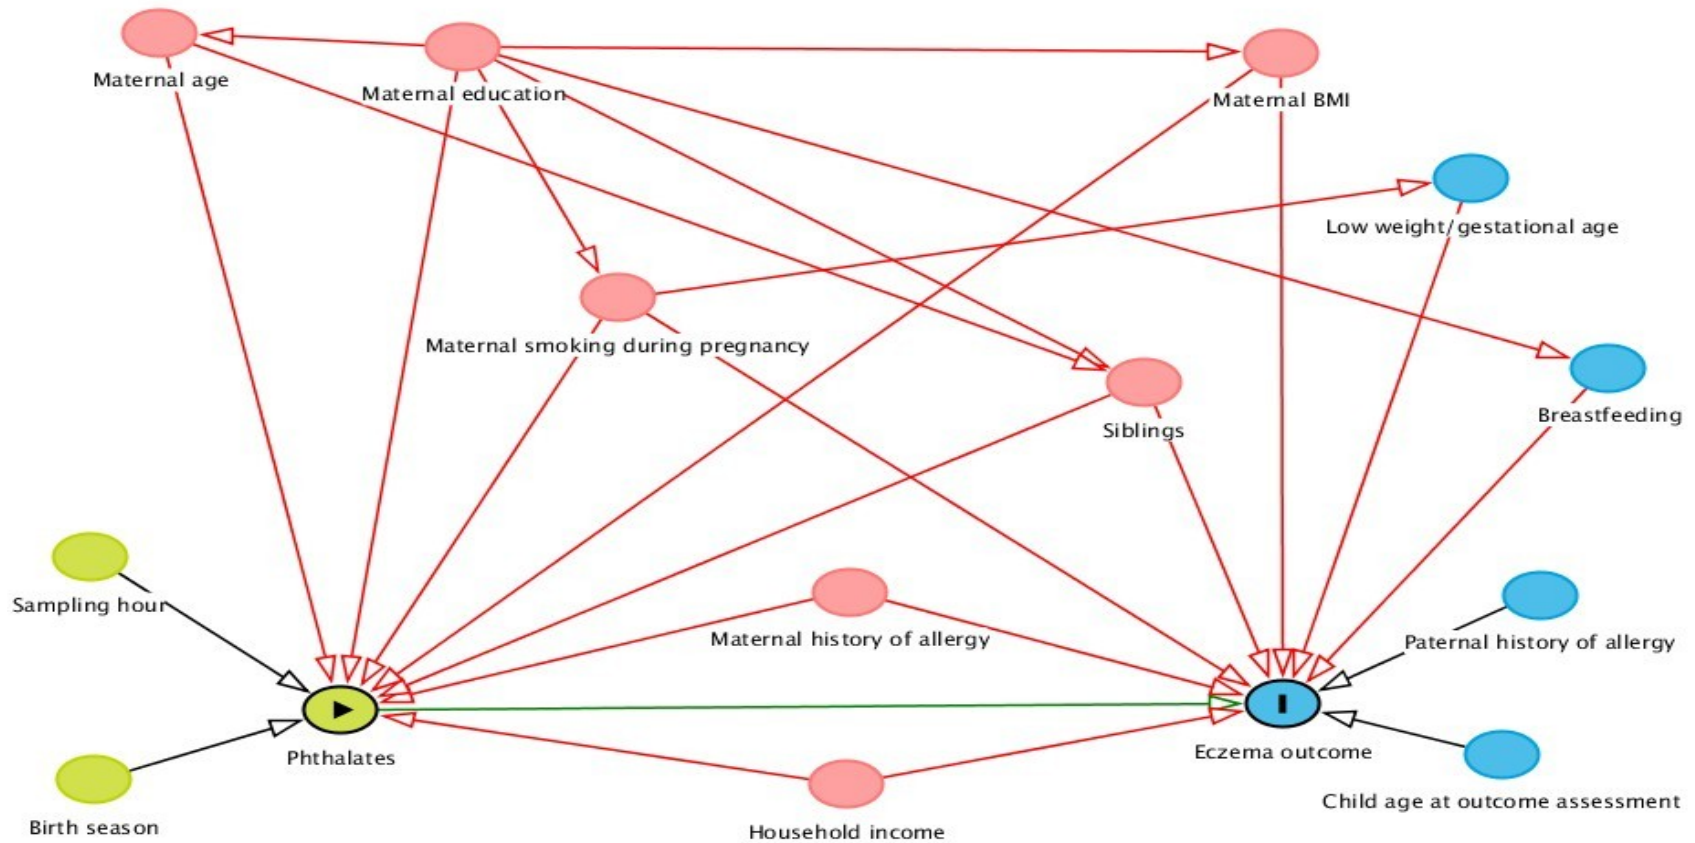

**Figure-S1:** Directed acyclic graph (DAG) for evaluation of covariate selection in the analysis of phthalates and eczema. Green nodes: Variables associated to phthalates levels, Blue nodes: Variables associated to eczema occurrence, Red nodes: Variables associated to phthalates and eczema outcomes

**Table S1.** Spearman correlation between ln-transformed standardized<sup>‡</sup> urinary concentrations of phthalate metabolites.

|              | <b>MBP</b> | <b>MiBP</b> | <b>MECPP</b> | <b>MEHHP</b> | <b>MEOHP</b> | <b>MEHP</b> | <b>MBzP</b> | <b>MCOP</b> | <b>MCP</b> | <b>MCNP</b> |
|--------------|------------|-------------|--------------|--------------|--------------|-------------|-------------|-------------|------------|-------------|
| <b>MEP</b>   | 0.13*      | 0.03        | 0.04         | 0.06         | 0.08*        | 0.08*       | 0.10*       | 0.07        | 0.02       | 0.01        |
| <b>MBP</b>   |            | 0.37*       | 0.26*        | 0.31*        | 0.32*        | 0.24*       | 0.40*       | 0.13*       | 0.62*      | 0.13*       |
| <b>MiBP</b>  |            |             | 0.26*        | 0.29*        | 0.30*        | 0.27*       | 0.38*       | 0.20*       | 0.24*      | 0.11*       |
| <b>MECPP</b> |            |             |              | 0.90*        | 0.92*        | 0.77*       | 0.31*       | 0.36*       | 0.31*      | 0.27*       |
| <b>MEHHP</b> |            |             |              |              | 0.97*        | 0.83*       | 0.36*       | 0.33*       | 0.35*      | 0.25*       |
| <b>MEOHP</b> |            |             |              |              |              | 0.84*       | 0.38*       | 0.32*       | 0.36*      | 0.24*       |
| <b>MEHP</b>  |            |             |              |              |              |             | 0.31*       | 0.25*       | 0.27*      | 0.19*       |
| <b>MBzP</b>  |            |             |              |              |              |             |             | 0.19*       | 0.28*      | 0.17*       |
| <b>MCOP</b>  |            |             |              |              |              |             |             |             | 0.28*      | 0.42*       |
| <b>MCP</b>   |            |             |              |              |              |             |             |             |            | 0.33*       |

MEP = Monoethyl phthalate; MBP = Mono-n-butyl phthalate; MiBP = Mono-isobutyl phthalate; MECPP = Mono(2-ethyl-5-carboxypentyl) phthalate; MEHHP = Mono(2-ethyl-5-hydroxyhexyl) phthalate; MEOHP = Mono(2-ethyl-5-oxohexyl) phthalate; MEHP = Mono(2-ethylhexyl) phthalate; MBzP = Monobenzyl phthalate; MCOP = Monocarboxy-isoocetyl phthalate; MCP = Mono(3-carboxypropyl) phthalate; MCNP = Monocarboxy-isononyl phthalate

<sup>‡</sup> Standardized for urine sampling conditions (creatinine level, gestational age, day and hour of sampling, storage duration at room temperature and year of analysis) as described in detail by Mortamais et al (2012)

\* P<0.05

**Table S2.** Association between maternal urinary concentrations of phthalate metabolites and occurrence of ever eczema in boys according to atopic status as assessed by Total IgE.

| Phthalate metabolite | Non-Sensitized Boys<br>n=233/293 |            |         | Sensitized Boys<br>n=60/293 |                              |              |
|----------------------|----------------------------------|------------|---------|-----------------------------|------------------------------|--------------|
|                      | HR <sup>a</sup>                  | 95% CI     | P-Value | HR                          | 95% CI                       | P-Value      |
| MEP                  | 1.13                             | 0.82-01.56 | 0.44    | 1.17                        | 0.71-1.93                    | 0.53         |
| MBP                  | 0.90                             | 0.63-1.28  | 0.55    | <b>1.67</b>                 | <b>1.10-2.54*</b>            | <b>0.01</b>  |
| MIBP                 | 1.32                             | 0.86-2.01  | 0.19    | <b>1.87</b>                 | <b>1.01-3.48*</b>            | <b>0.04</b>  |
| MECPP                | 1.05                             | 0.68-1.62  | 0.81    | <b>2.15</b>                 | <b>1.32-3.50*</b>            | <b>0.002</b> |
| MEHHP                | 1.07                             | 0.72-1.57  | 0.73    | <b>2.02</b>                 | <b>1.27-3.19*</b>            | <b>0.003</b> |
| MEOHP                | 1.08                             | 0.73-1.62  | 0.68    | <b>2.02</b>                 | <b>1.26-3.25*</b>            | <b>0.004</b> |
| MEHP                 | 1.14                             | 0.82-1.59  | 0.42    | <b>2.35</b>                 | <b>1.35-4.08*</b>            | <b>0.002</b> |
| MBzP                 | 1.13                             | 0.80-1.60  | 0.48    | <b>1.47</b>                 | <b>0.98-2.20<sup>†</sup></b> | <b>0.06</b>  |
| MCOP                 | 1.20                             | 0.76-1.77  | 0.49    | 1.51                        | 0.85-2.67                    | 0.16         |
| M CPP                | 1.15                             | 0.70-1.89  | 0.57    | 1.51                        | 0.81-2.81                    | 0.18         |
| MCNP                 | 1.14                             | 0.82-1.56  | 0.41    | 1.41                        | 0.89-2.21                    | 0.14         |
| <b>ΣDEHP</b>         | 1.02                             | 0.93-1.13  | 0.66    | <b>1.22</b>                 | <b>1.07-1.38*</b>            | <b>0.002</b> |

<sup>a</sup>HR: Hazard Ratio according to the proportional cox's model.

HRadjusted for maternal smoking, maternal age, maternal BMI, education level, gestational age, number of siblings, and recruitment Centre

MEP = Monoethyl phthalate; MBP = Mono-n-butyl phthalate; MiBP = Mono-isobutyl phthalate; MECPP = Mono (2-ethyl-5-carboxypentyl) phthalate; MEHHP = Mono (2-ethyl-5-hydroxyhexyl) phthalate; MEOHP = Mono (2-ethyl-5-oxohexyl) phthalate; MEHP = Mono (2-ethylhexyl) phthalate; MBzP = Monobenzyl phthalate; MCOP = Monocarboxy-isoctyl phthalate; M CPP = Mono (3-carboxypropyl) phthalate; MCNP = Monocarboxy-isononyl phthalate; DEHP = di(2-ethylhexyl) phthalate.

\*P<0.05

<sup>†</sup>P<0.10
